# Supplementary material for: The protective role of conjunctival goblet cell mucin sialylation
Source: PubMed Central journal article supplement (PMC10023771; doi:10.1038/s41467-023-37101-y), 2023-03-17

## **Supplementary Information**

### **The protective role of conjunctival goblet cell mucin sialylation**

**Moe Matsuzawa, Tomoaki Ando, Saaya Fukase, Meiko Kimura, Yasuharu Kume, Takuma Ide, Kumi Izawa, Ayako Kaitani, Mutsuko Hara, Eri Nakamura, Anna Kamei, Akira Matsuda, Nobuhiro Nakano, Keiko Maeda, Norihiro Tada, Hideoki Ogawa, Ko Okumura, Akira Murakami, Nobuyuki Ebihara, and Jiro Kitaura**

#### **Content:**

**Supplementary Tables 1-2**

**Supplementary Figures 1-11**

**Supplementary Source Data**

Supplementary Table 1. Oligos used for this study.

| <b>qPCR primers</b>        |                |                                   |
|----------------------------|----------------|-----------------------------------|
| Muc1                       | F              | CAACCCAGGACACCTACCATC             |
|                            | R              | TTACCTGCCGAAACCTCCTCA             |
| Muc4                       | F              | ACCAGATGGCTCTGAACCTAAGTA          |
|                            | R              | GGTGGTAGCCTTTGTAGCCAT             |
| Muc16                      | F              | CGGATCAGTGGAAAGGCATGA             |
|                            | R              | GCTTGTTCCATGGTTGGCAG              |
| Muc5ac                     | F              | CTTCTGTCCTGAGGGTATGGTG            |
|                            | R              | CATGTGTTGGTGCAGTCAGTAGA           |
| St6galnac1                 | Fq             | AGCCTCGGTGGGATTTTGGAG             |
|                            | Rq             | CAGAAGCAGAGCAGTTTCGTC             |
|                            | F3             | CTGTGCTGTAGTGGGCAACG              |
|                            | R3             | GGCTCCACTCAGTCGGAAA               |
|                            | F4             | TGACTATGTTTTCCGACTGAGTG           |
|                            | R4             | CATGCTGGAAGCCTCGTCTA              |
| St6galnac2                 | F              | GGGACAGGCCTCACACCTATT             |
|                            | R              | TGATGAAGTCTGGGTGCAGG              |
| C1galt1                    | F              | TGGGAAAGAAACCTTCCATCCAT           |
|                            | R              | TCCAGGACCCTCTATGGGAG              |
| C1galt1c1                  | F              | GGAGCCGTTCTAGATGCGGAAA            |
|                            | R              | GATGCTCATGGTGGTGCATTTC            |
| St3gal4                    | F              | CTGCGCGCGGATTTACCT                |
|                            | R              | CAGGAGCTTCCAGTGAGATTTGCT          |
| St6gal1                    | F              | ACCATCCGCCTAGTGAAGTC              |
|                            | R              | ACACAGATGGGTCCCACAGA              |
| St8sia6                    | F              | CCAGTGTGCAGTGGTTGGTA              |
|                            | R              | ACTAGCGCTCCCTGTGATTG              |
| Gcnt3                      | F              | ACTCACGGCGTTGGAGAAAG              |
|                            | R              | CACAGGCGAGGACCATCAAG              |
| Neu1                       | F              | TAAGGACGACGGCATTTCCT              |
|                            | R              | GTCCCGTGTCCACACACAAT              |
| <b>Cloning primers</b>     |                |                                   |
| St6galnac1                 | Cloning F      | AAA CTCGAG CTGTTAGGGACCAGCCATCC   |
|                            | Cloning R      | AAA GCGGCCGC GAGGAGCCCTTGCATTCTGT |
| Colony PCR                 | F1             | CAGGAAACAGCTATGAC                 |
|                            | R1             | GTAAAACGACGGCCAG                  |
| St6galnac1<br>Nested PCR   | F2             | CCTGTGCTGTAGTGGGCAAC              |
|                            | R2             | CTGGAAGCCTCGTCTACCC               |
| <b>Genotyping PCR</b>      |                |                                   |
| Region 1                   | B6J-F          | GTATGTTCTCCCTCCGTTGCT             |
| Region 1                   | B6J-R          | TGTGGAGATGAATCAGGAGGC             |
| Region 2/4                 | B6J-F          | TGTGTCTACAGCTCCTGCCT              |
| Region 2/4                 | Balb/Gm11735-F | AGTGTGTCTACAGCTCCTACCC            |
| Region 2                   | Common-R       | CTCATTGGTCTCCCATGTTTCAGG          |
| Region 4                   | B6J/Balb-R     | TTTCCATCCACATACAAGGCG             |
| Region 3                   | B6J-F          | TCTTTCTACACAG                     |
| Region 3                   | Common-R       | TTCTCACCTTTC                      |
| <b>sgRNA preparation</b>   |                |                                   |
| ST6GALNAC1                 | F              | CACCGAAGGCACCCGGGACTATGAG         |
|                            | R              | AAACCTCATAGTCCCGGGTGCCTTC         |
| C1GALT1                    | F              | CACCGTATTGCTGATCCACAGAGGA         |
|                            | R              | AAACTCCTCTGTGGATCAGCAATAC         |
| Non-targeting<br>control 1 | F              | CACCGACTCGACCTAACGTCGATGT         |
|                            | R              | AAACACATCGACGTTAGGTCGAGTC         |
| Non-targeting<br>control 2 | F              | CACCGTGTGATCCACCGATCGTAT          |
|                            | R              | AAACATACGATCGGTGGATCACAC          |

Supplemental Table 2. Comparisons of sialyltransferase amino acid sequences between B6J and Balb/c strains.

| Sialyltransferase | Ensembl canonical mRNA | peptide length (a.a.) | Balb/c mRNA           | peptide length (a.a.) | Comparision of peptide sequences                       |
|-------------------|------------------------|-----------------------|-----------------------|-----------------------|--------------------------------------------------------|
| St6galnac1        | ENSMUST00000009732.8   | 526                   | MGP_BALBcJ_T0033675.1 | 553                   | This study found new transcripts in Balb/c (Figure 2f) |
| St6galnac2        | ENSMUST00000079545.6   | 373                   | MGP_BALBcJ_T0033669.1 | 373                   | Identical                                              |
| St6galnac3        | ENSMUST00000200397.5   | 305                   | MGP_BALBcJ_T0064346.1 | 305                   | Identical                                              |
| St6galnac4        | ENSMUST00000102818.11  | 302                   | MGP_BALBcJ_T0054114.1 | 302                   | Identical                                              |
| St6galnac5        | ENSMUST00000044278.6   | 335                   | MGP_BALBcJ_T0064344.1 | 336                   | Q48dup in Balb/c                                       |
| St6galnac6        | ENSMUST00000081879.12  | 335                   | MGP_BALBcJ_T0054125.1 | 335                   | Identical                                              |
| St6gal1           | ENSMUST00000023601.14  | 403                   | MGP_BALBcJ_T0043849.1 | 403                   | Identical                                              |
| St6gal2           | ENSMUST00000025000.4   | 524                   | MGP_BALBcJ_T0048155.1 | 524                   | R48S in Balb/c                                         |
| St3gal1           | ENSMUST00000229028.2   | 337                   | MGP_BALBcJ_T0041093.1 | 337                   | Identical                                              |
| St3gal2           | ENSMUST00000034197.5   | 350                   | MGP_BALBcJ_T0090478.1 | 350                   | Identical                                              |
| St3gal3           | ENSMUST00000030263.9   | 374                   | MGP_BALBcJ_T0067342.1 | 374                   | Identical                                              |
| St3gal4           | ENSMUST00000034537.8   | 333                   | MGP_BALBcJ_T0091643.1 | 333                   | E65D in Balb/c                                         |
| St3gal5           | ENSMUST00000069994.11  | 414                   | MGP_BALBcJ_T0078051.1 | 414                   | Identical                                              |
| St3gal6           | ENSMUST00000137035.8   | 329                   | MGP_BALBcJ_T0044700.1 | 329                   | Identical                                              |
| St8sia1           | ENSMUST00000032421.4   | 355                   | MGP_BALBcJ_T0080903.1 | 355                   | Identical                                              |
| St8sia2           | ENSMUST00000026896.10  | 375                   | MGP_BALBcJ_T0084463.1 | 375                   | Identical                                              |
| St8sia3           | ENSMUST00000025477.15  | 380                   | MGP_BALBcJ_T0049816.1 | 380                   | Identical                                              |
| St8sia4           | ENSMUST00000043336.11  | 359                   | MGP_BALBcJ_T0021469.1 | 359                   | Identical                                              |
| St8sia5           | ENSMUST00000075290.8   | 412                   | MGP_BALBcJ_T0050076.1 | 412                   | Identical                                              |
| St8sia6           | ENSMUST00000003509.10  | 398                   | MGP_BALBcJ_T0052609.1 | 398                   | Identical                                              |

Supplementary Figure 1

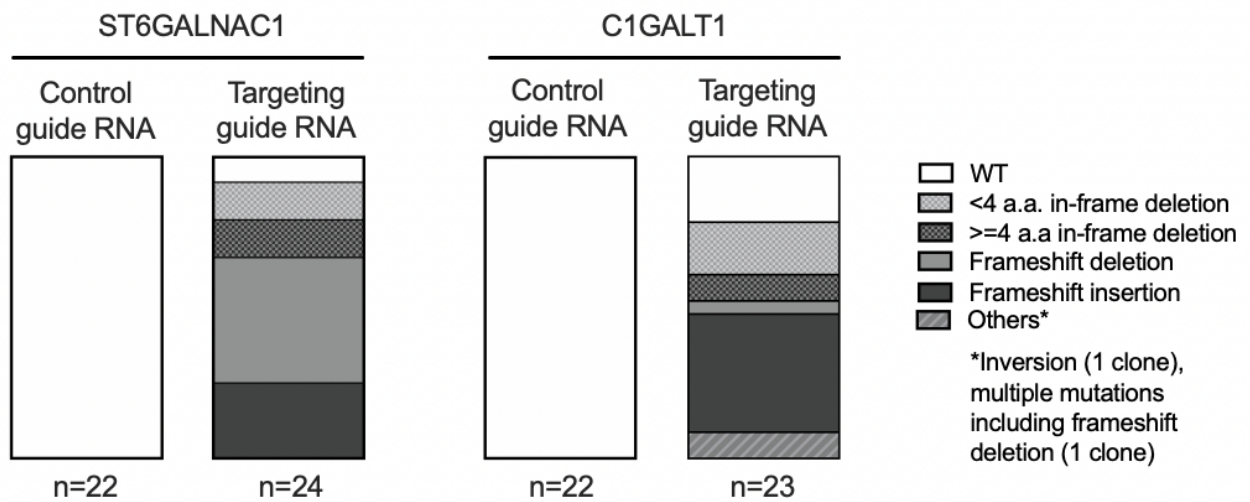

**Supplementary Fig. 1. Genome editing results of ST6GALNAC1 and C1GALT1.**

The mutation patterns were determined by Sanger sequencing of indicated target regions. Source data are provided as a Source Data file.

Supplementary Figure 2

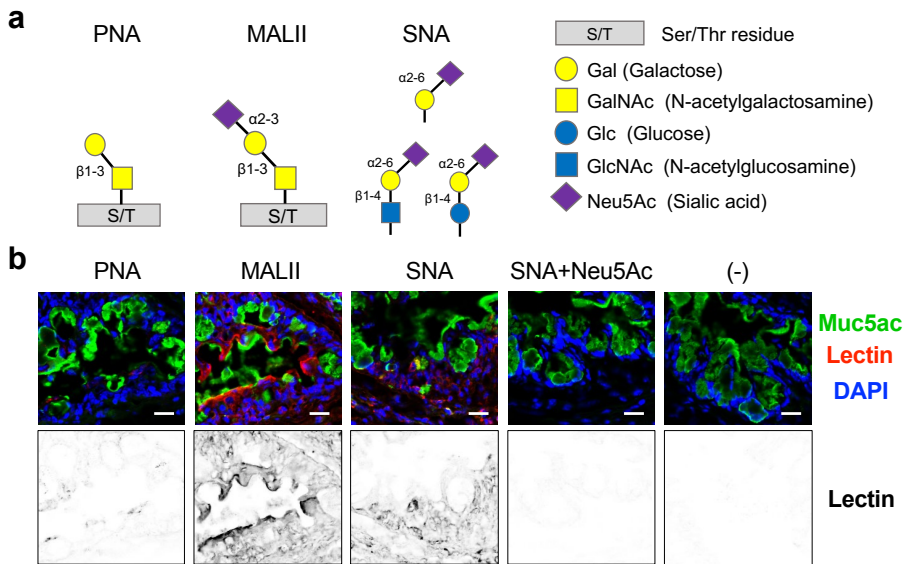

**Supplementary Fig. 2. Lectins detected no sialic acid linked to galactose residue in conjunctival goblet cells.**

**a** Specificities of lectins used. **b** B6J conjunctiva was stained with the indicated lectins together with anti-Muc5ac antibody. Data are representative of two independent experiments. Bar, 20  $\mu$ m.

Supplementary Figure 3

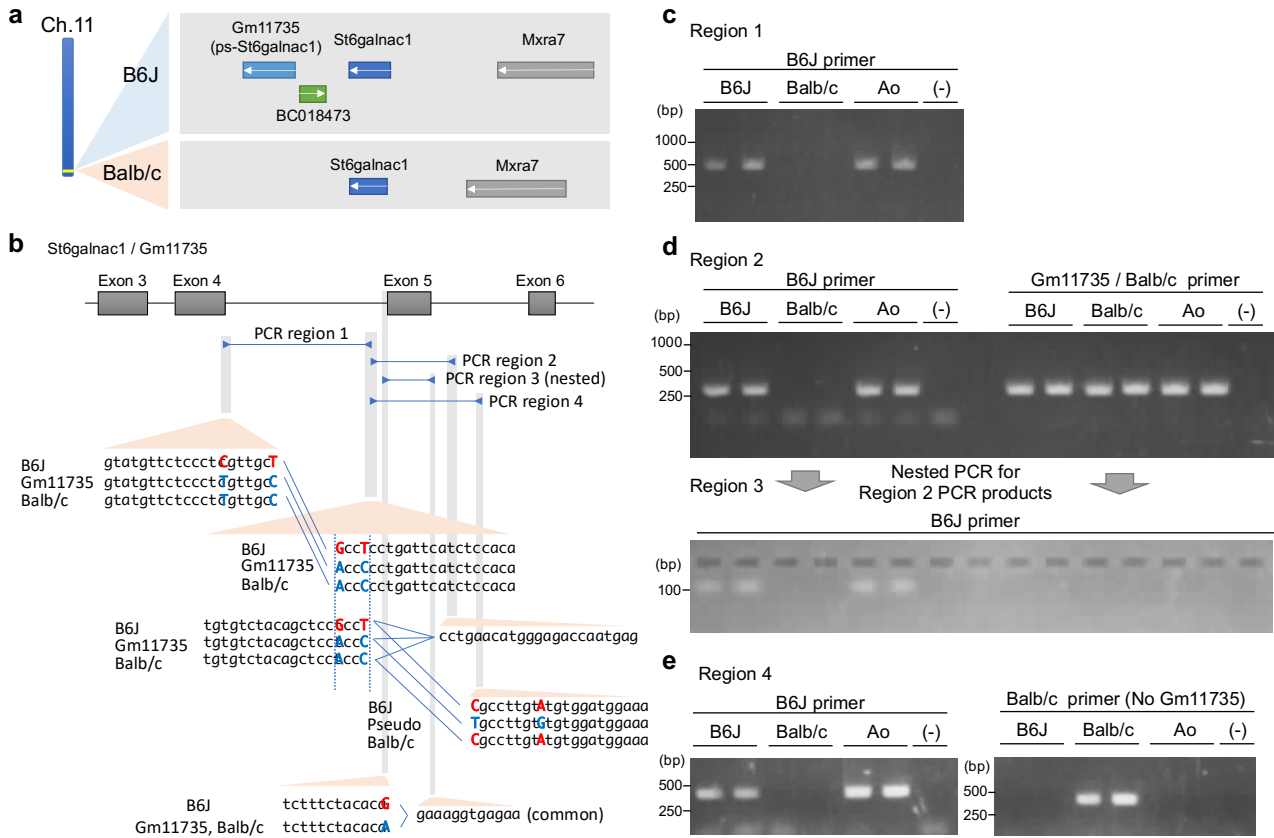

**Supplementary Fig. 3. Genotyping strategy for B6J-derived intact St6galnac1 allele.**

**a** Gene coordination of B6J and Balb/c strains near St6galnac1 gene on chromosome (Ch.) 11. B6J has an extra pseudogene for St6galnac1 (Gm11735). **b** Genotyping primers and genomic sequences of St6galnac1 and Gm11735 pseudogene. Nested PCR (region 3) can distinguish the single base mutation at the 3' splice site before exon 5. **c-e** Genotyping PCR results of B6J, Balb/c, and Ao strains for regions 1 (**c**), 2 and 3 (**d**), and 4 (**e**). The PCR results for two mice for each strain are shown. Source data are provided at the end of Supplementary Information.

Supplementary Figure 4

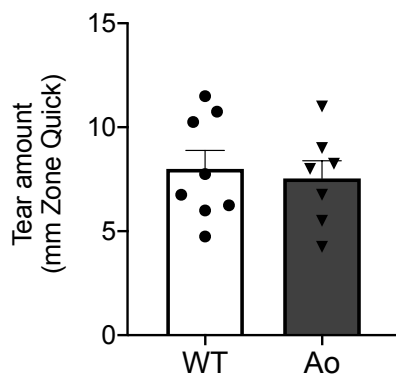

**Supplementary Fig. 4. Tear volume was unaffected by the presence of sialic acid.** The tear amounts of steady state WT Balb/c (n=8) and Ao (n=7) mice were measured by Zone-quick phenol red threads and shown as an averaged wet lengths for both eyes. Data are representative of at least two independent experiments. Source data are provided as a Source Data file.

Supplementary Figure 5

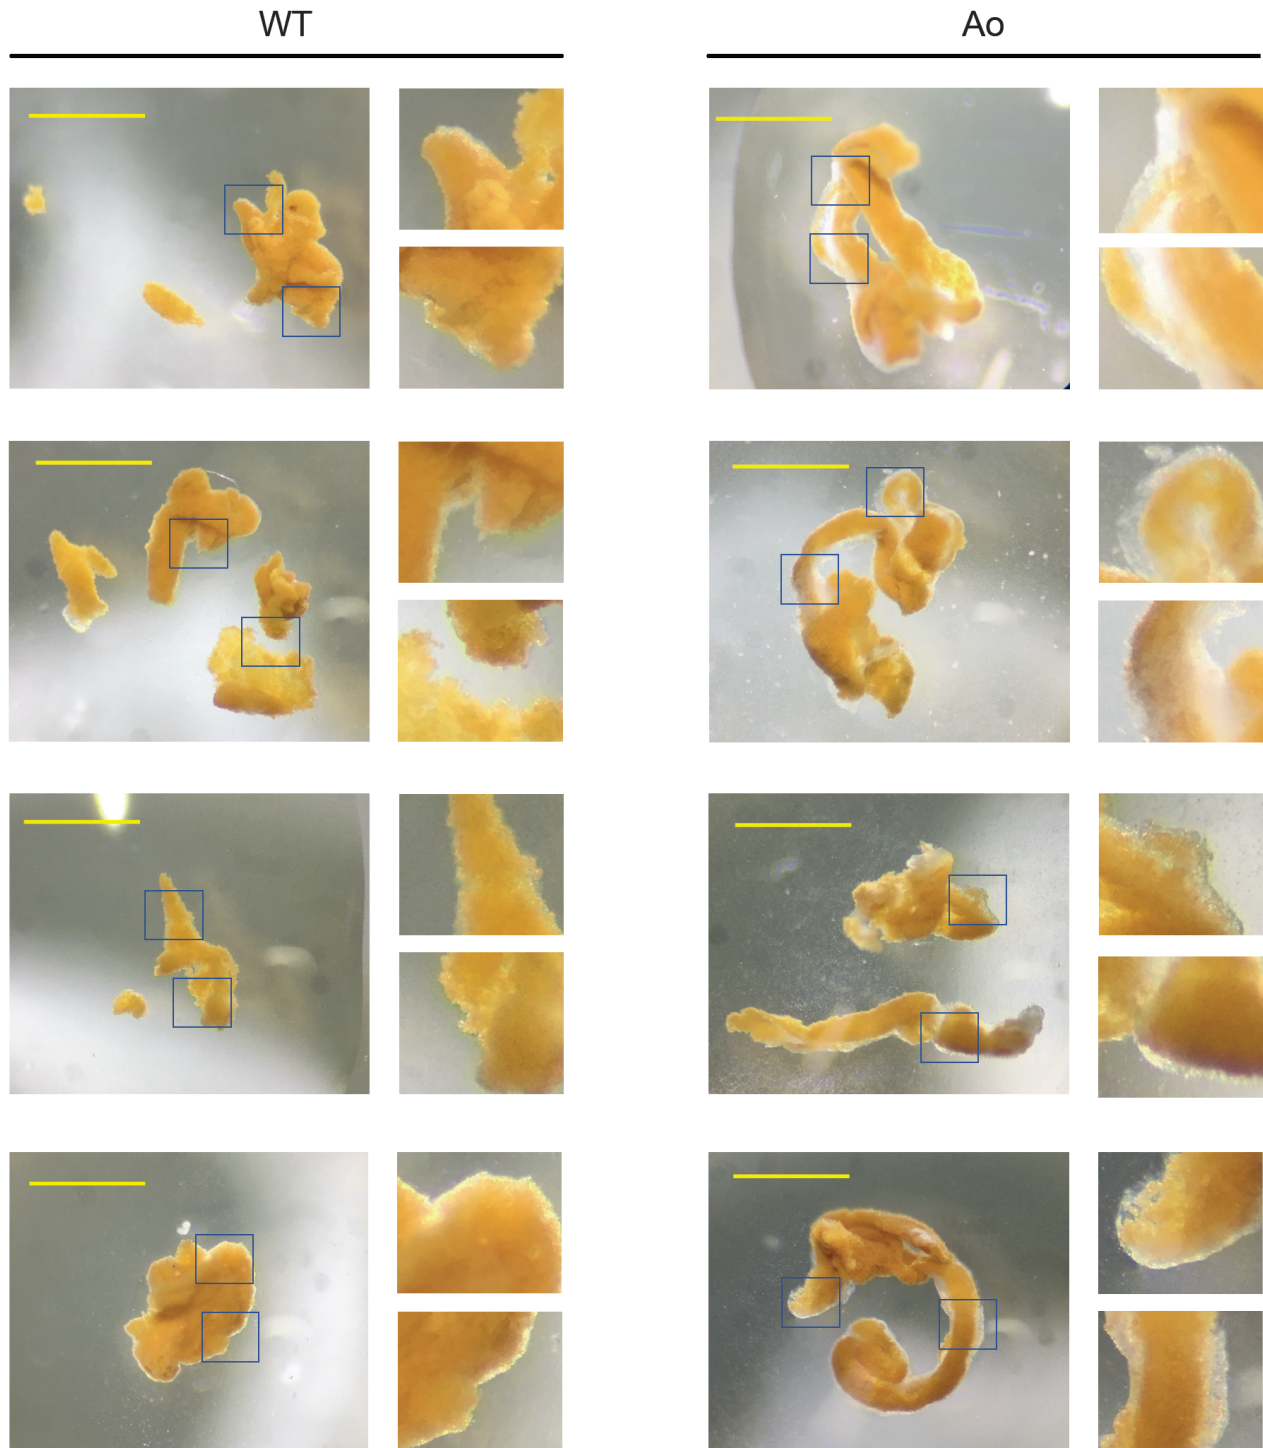

**Supplementary Fig. 5. Pollen shells are encapsulated by mucus layer in *Ao* mice.**

More representative pictures related to Fig. 5. Bar, 1 mm. Data are representative of at least three independent experiments.



Supplementary Figure 6

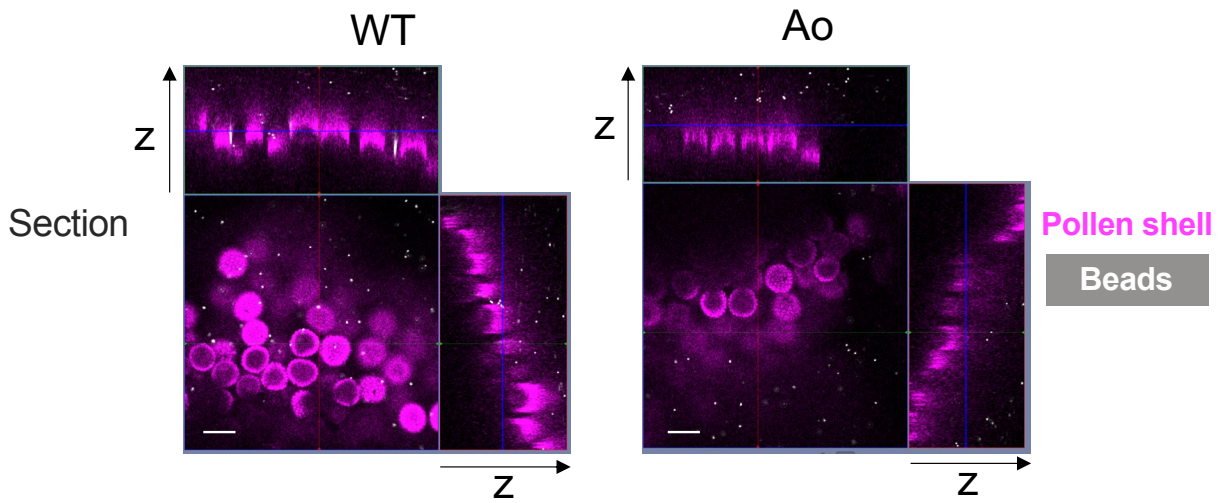

**Supplementary Fig. 6. Fluorescent beads have access to the pollen shell surface of the aggregate from WT, but not to that of the aggregate from Ao mice.**

The pollen aggregates shown in Fig 5b were shown in X-Y, X-Z, and Y-Z sections. Data are representative of two independent experiments. Bar, 20  $\mu\text{m}$ .

Supplementary Figure 7

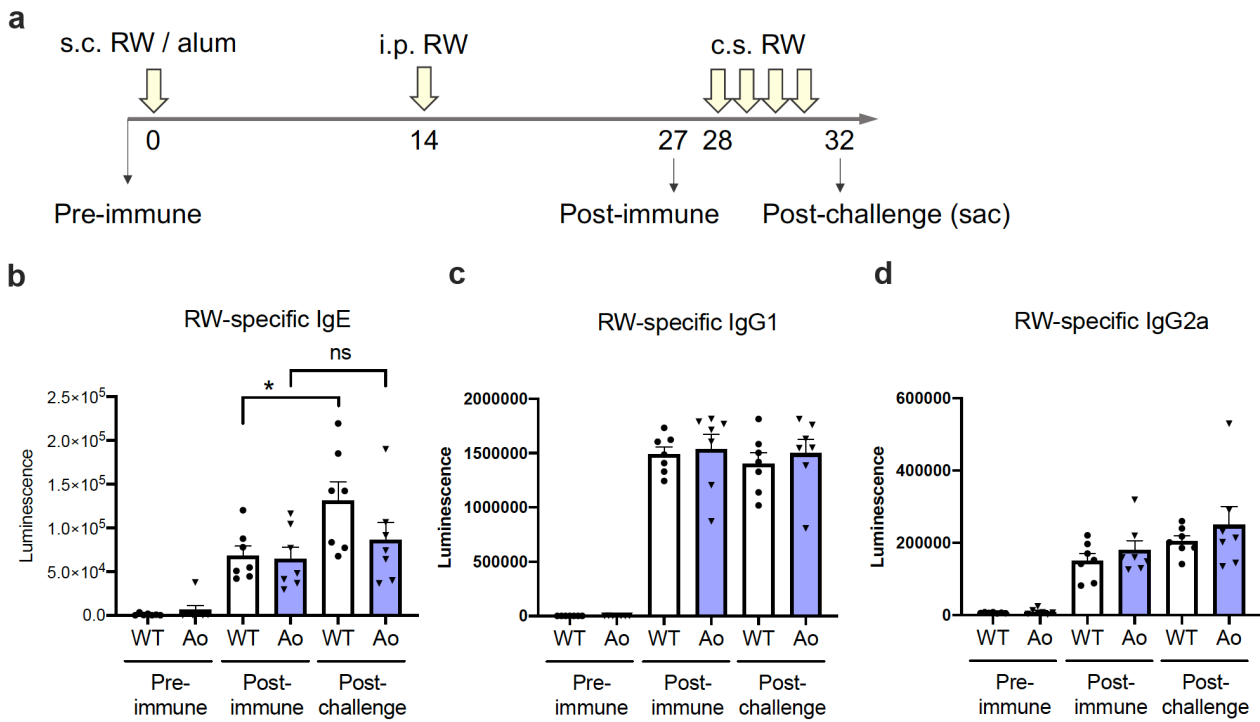

**Supplementary Fig. 7. Humoral responses were not affected at the sensitization phase.**

**a** Schematic diagram of the allergic conjunctivitis model. Timing of blood drawing is shown in thin arrows. s.c., subcutaneous injection; i.p., intraperitoneal injection; c.s., instillation into conjunctival sac; sac, sacrifice. **b-d** Levels of RW-specific IgE (**b**), IgG1 (**c**), and IgG2a (**d**).  $n=7$  for each strain.  $*p<0.05$  (adjusted  $p = 0.0142$ ) and ns, not significant (adjusted  $p = 0.0796$ ) by two-tailed matched ANOVA with Geisser-Greenhouse correction and Holm-Sidak multiple comparisons for indicated pairs. Data are representative of at least three independent experiments. Source data are provided as a Source Data file.

Supplementary Fig 8.

**a**

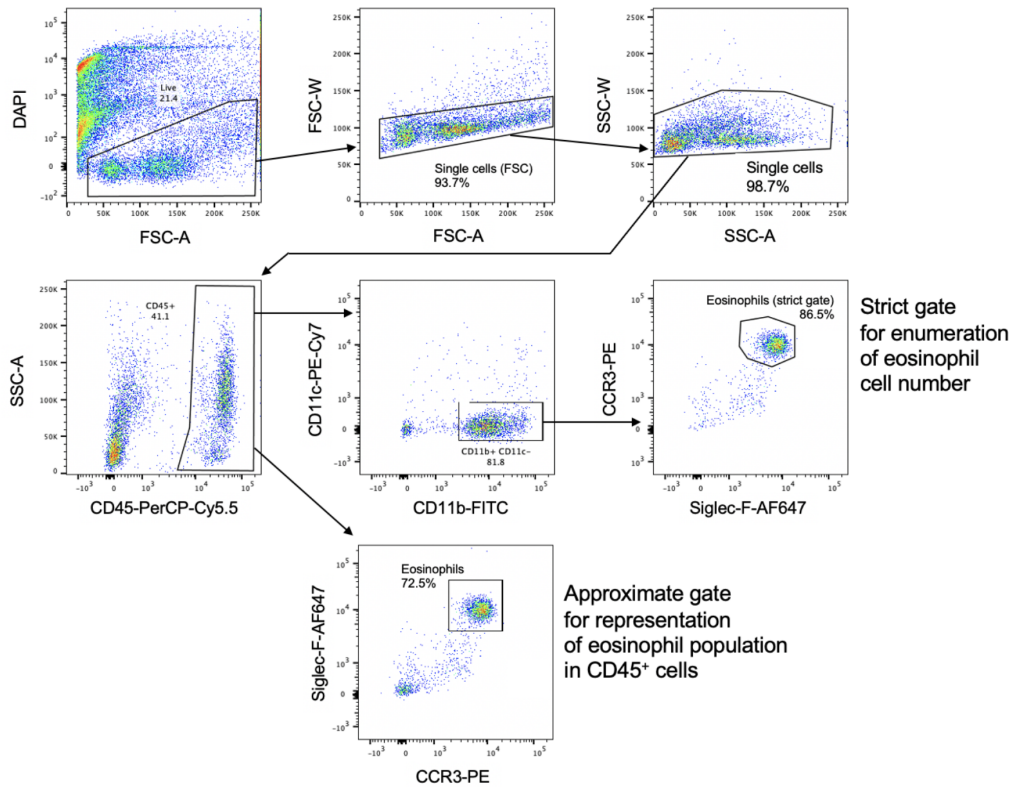

**b**

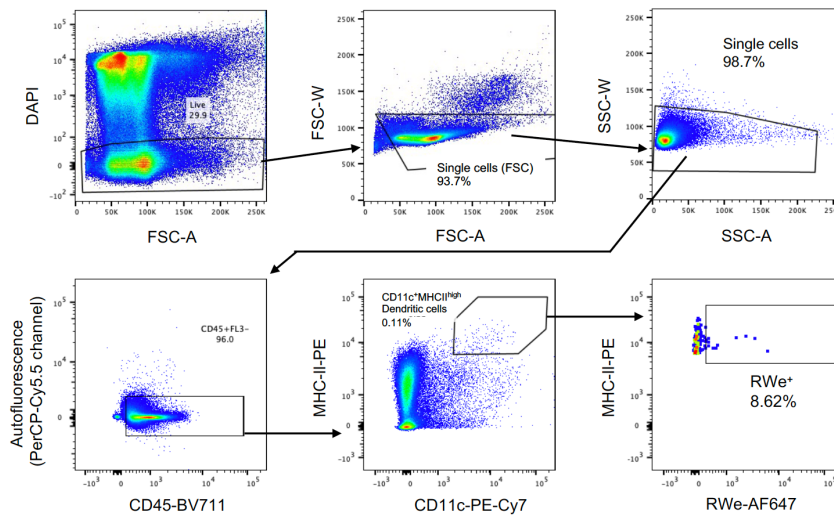

**Supplementary Fig. 8 The gating strategy for eosinophils in the conjunctiva and migratory dendritic cells in the lymph nodes.**

**a** A gating example for the conjunctival eosinophils. A representative sample from allergic conjunctivitis-induced wild-type Balb/c mouse is shown. **b** A gating example for the migratory dendritic cells. A representative sample from RW extract (RWe) labeled with AF647-instilled wild-type Balb/c mouse is shown.

## Supplementary Figure 9

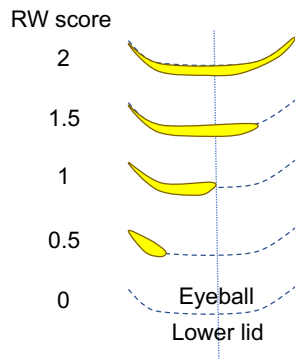

### **Supplementary Fig. 9 Scoring of RW pollens left in the conjunctiva.**

RW pollens applied to the lower conjunctival sac distribute along the edge of the eyeball and the lower lid. The amount of RW pollens left in the sac is scored by the total length of the pollen aggregate.

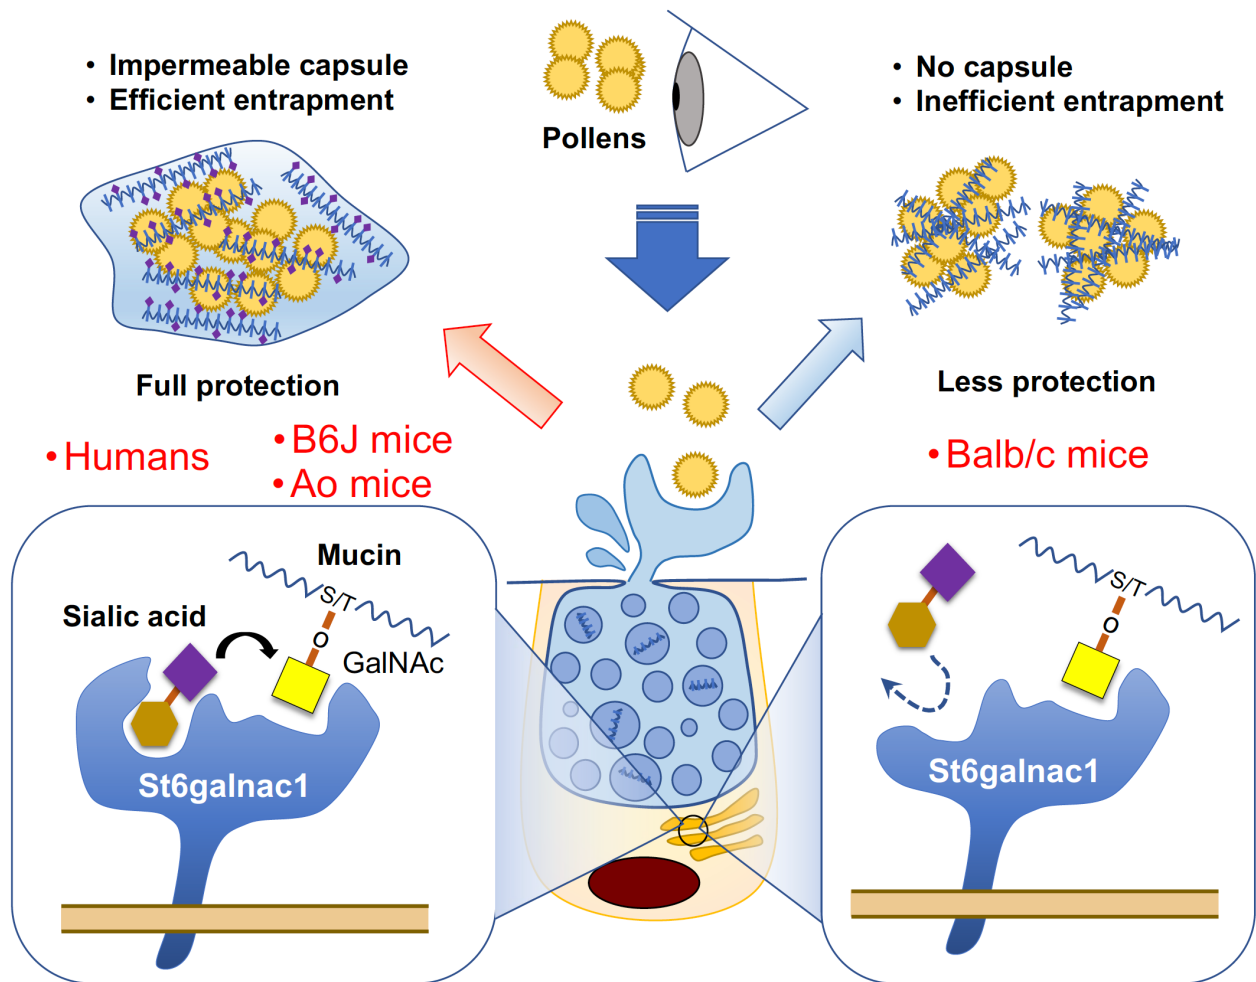

**Supplementary Fig. 10. Schematic summary of the findings.** Upon detection of the pollen particles, the conjunctival goblet cells secrete mucus containing Muc5ac. The mucus is AB-positive due to sialylation in humans and B6J mice, but not in Balb/c mice. Balb/c mice have a point mutation in a sialyltransferase *St6galnac1*. The sialylation was required for the efficient entrapment and encapsulation of the pollen particles with an impenetrable layer. Ao mice, which are fully Balb/c-backcrossed mice with intact *St6galnac1* alleles, are protected against allergic conjunctivitis. Human conjunctival goblet cells express ST6GALNAC1 and/or sialyl-Tn in conditions under chronic stimuli.

Supplementary Figure 11

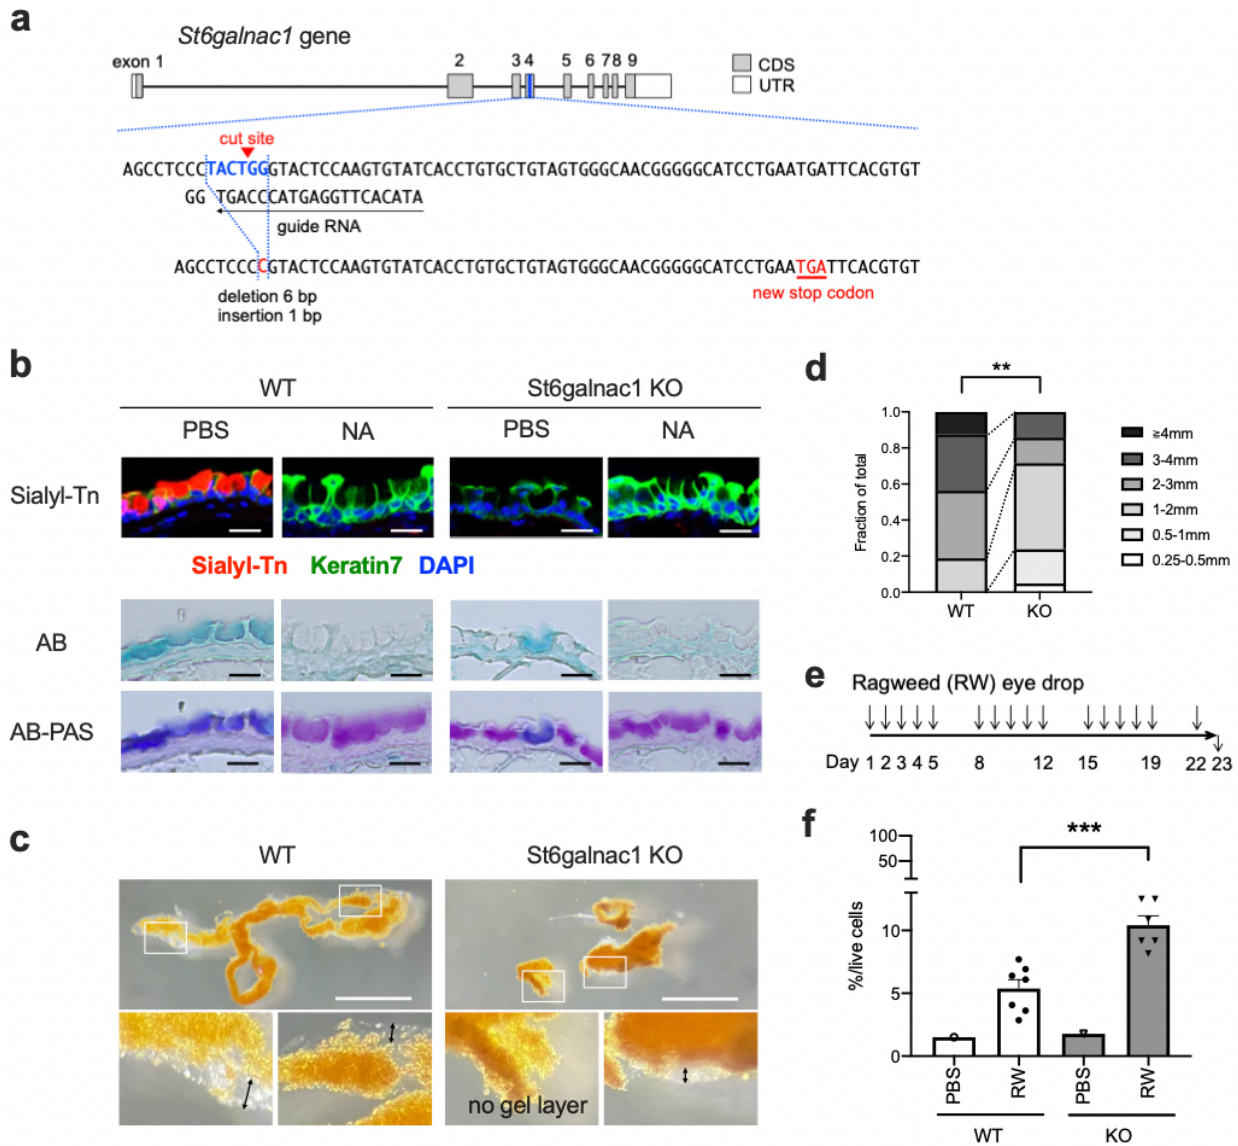

**Supplementary Fig. 11. *St6galnac1* knockout mice on B6J background present less-protective phenotype against allergic conjunctivitis compared to wild type mice.**

**a** Schematic representation of *St6galnac1* genome editing for *St6galnac1* knockout (KO) mouse generation. **b** PFA-fixed frozen sections were immunostained for sialyl-Tn followed by Alcian blue (AB) and Periodic Acid-Schiff (PAS) staining. Bar, 20  $\mu$ m. **c,d** The representative image (**c**) and length distribution (**d**) of pollen aggregates retrieved from WT (n=7) and KO (n=6) mice instilled with ragweed pollen suspension. Arrows indicate mucus layer thickness. Bar, 1 mm. \*\* $p < 0.01$  ( $p = 0.0025$ ) by two-tailed Fisher's exact test for the ratio of fractions  $< 2$  mm and  $\geq 2$  mm. Data are representative of at least two independent experiments. **e** An experimental schedule for the induction of the allergic conjunctivitis model. **f** Eosinophil frequencies in live single cells. n=1, 7, 1, and 6 for WT-PBS, WT-RW, KO-PBS and KO-RW, respectively. \*\*\* $p < 0.001$  ( $p = 0.0005$ ) by two-tailed Welch's t-test. Data are representative of at least three independent experiments. Source data are provided as a Source Data file.

Supplementary Source Data

Supplemental Fig 3c

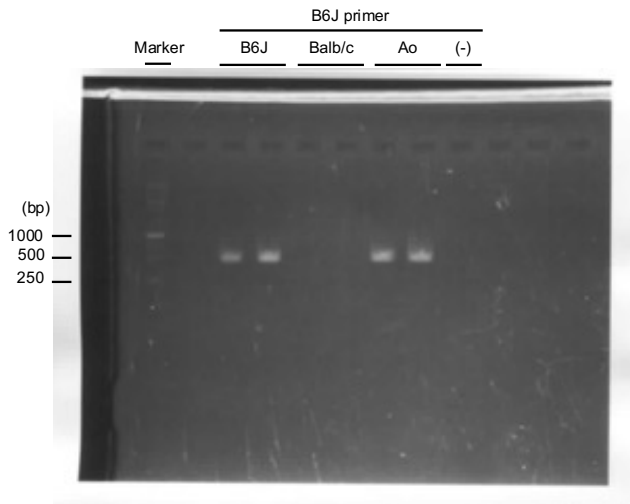

Supplementary Fig 3d

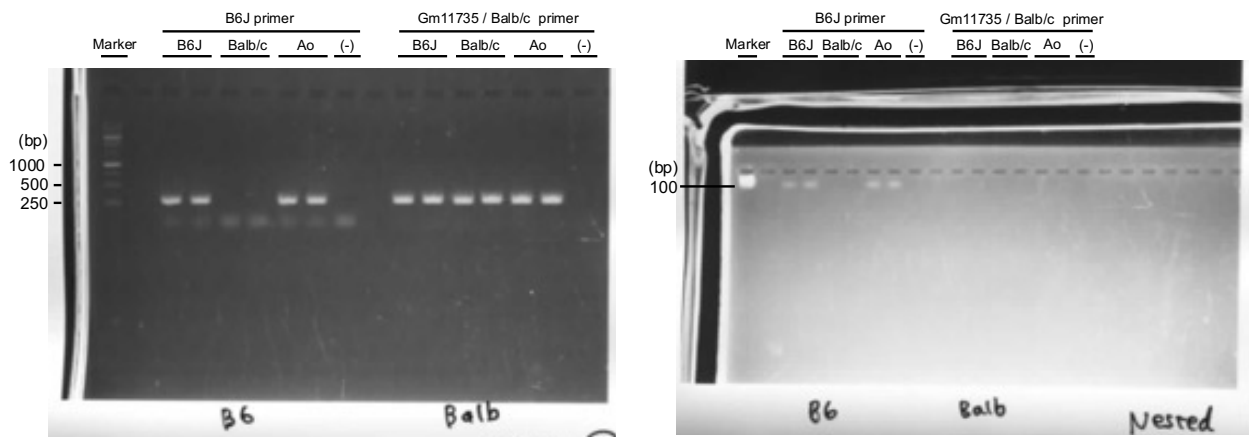

Supplementary Fig 3e

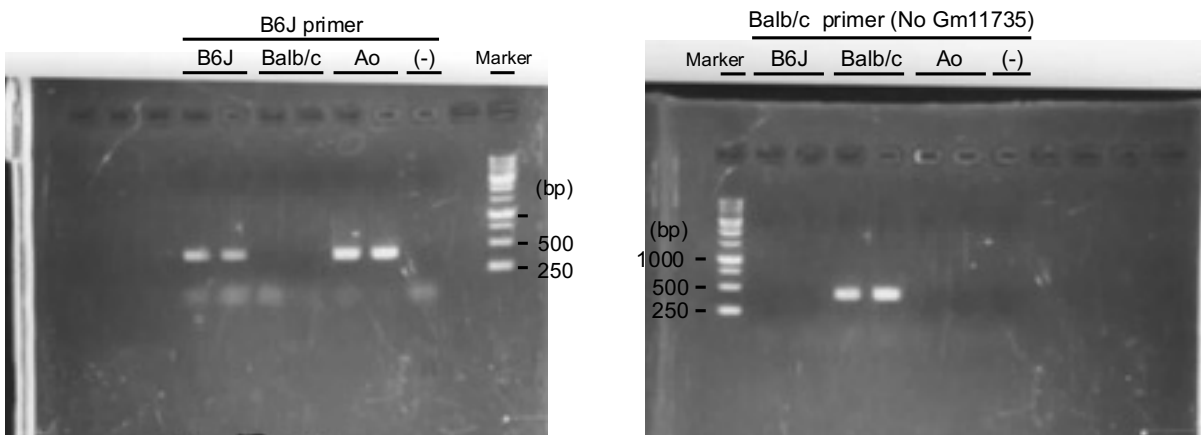

Supplement: 41467_2023_37101_MOESM1_ESM.pdf [file 41467_2023_37101_MOESM1_ESM.pdf]
